# Supplementary material for: A series of lanthanoid selenidoantimonates(v): rare examples of lanthanoid selenidoantimonates based on dinuclear lanthanide complexes
Source: Royal Society of Chemistry journal article supplement (doi:10.1039/c5dt00146c), 2015-01-01
Supplement: c5dt00146c1.pdf [file c5dt00146c1.pdf]

Supporting Information for

**A series of lanthanoid selenidoantimonates(V): the rare examples of  
lanthanoid selenidoantimonates based on dinuclear lanthanide  
complexes**

Hong-Ping Xiao, Jian Zhou, Rong-Qing Zhao, Wei-bing Zhang, and Yong Huang

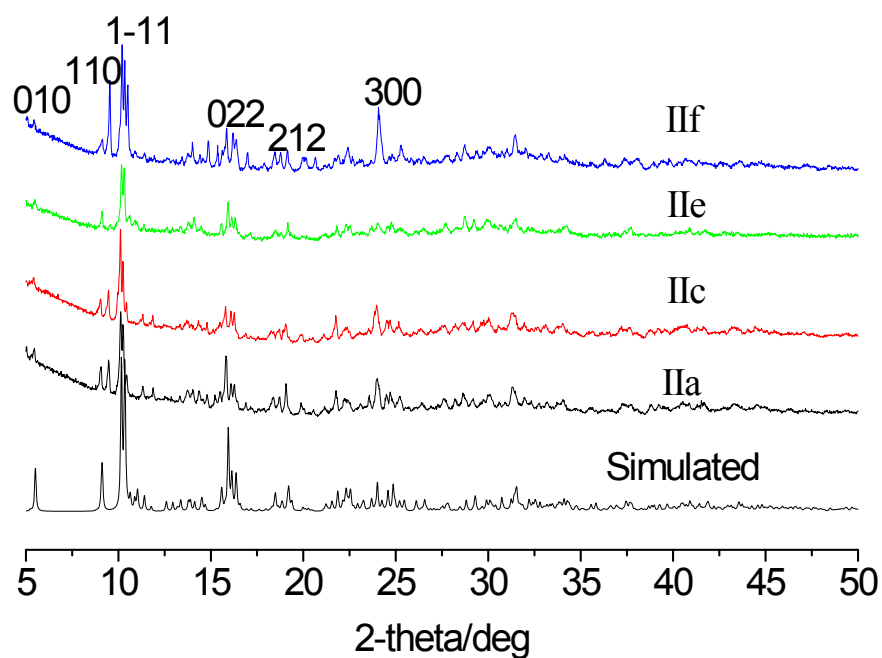

Figure S1 Simulated and experimental powder XRD patterns of **IIa**, **IIc**, **IIe** and **II f**.

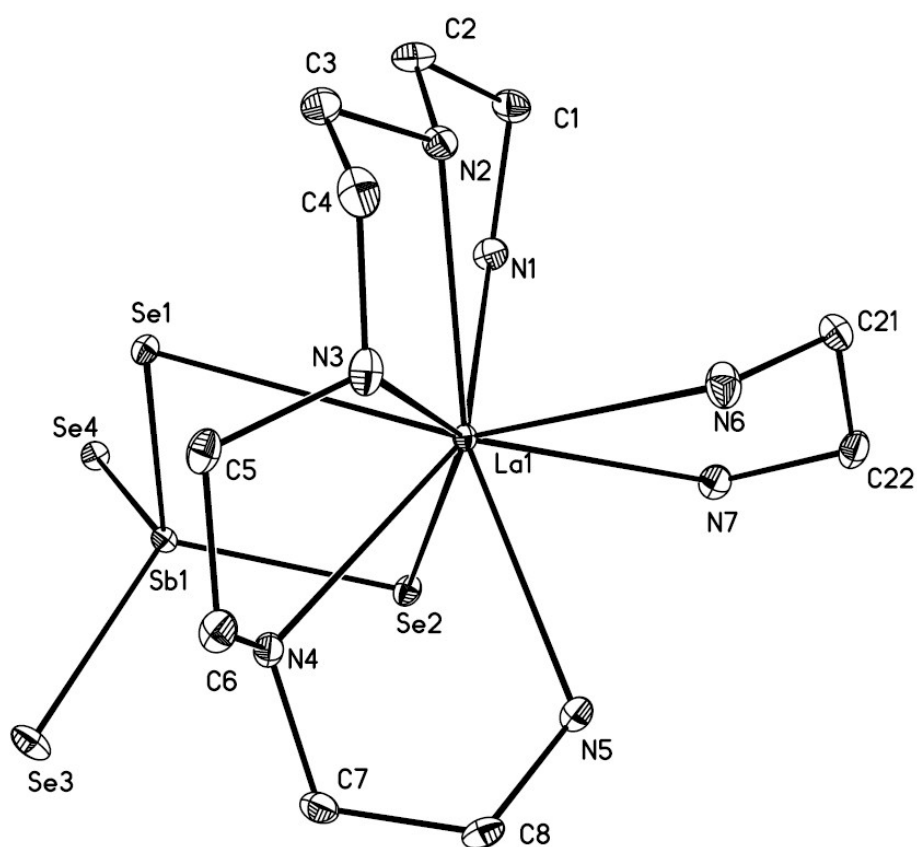

(a)

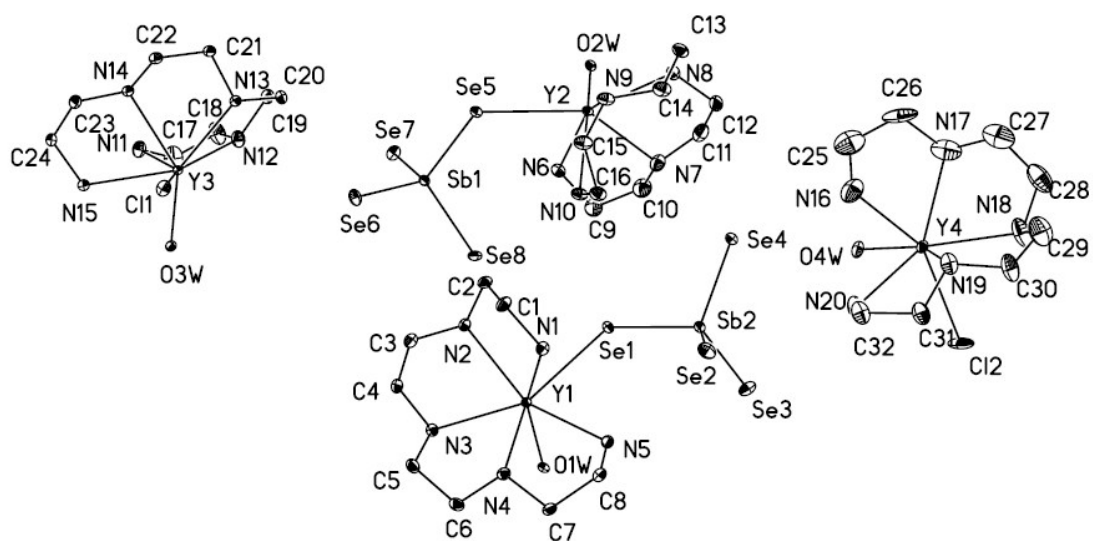

(b)

Figure S2 The asymmetric unit of **Ia** (a) and **IIa** (b) (H atoms bonded to C and N atoms have been omitted for clarity).

### Ia

Energy (eV)

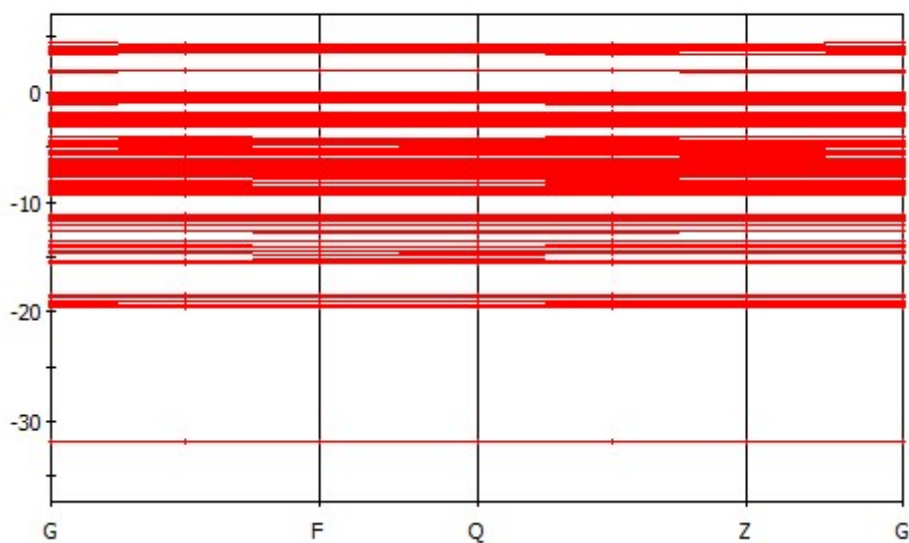

### IIc

Energy (eV)

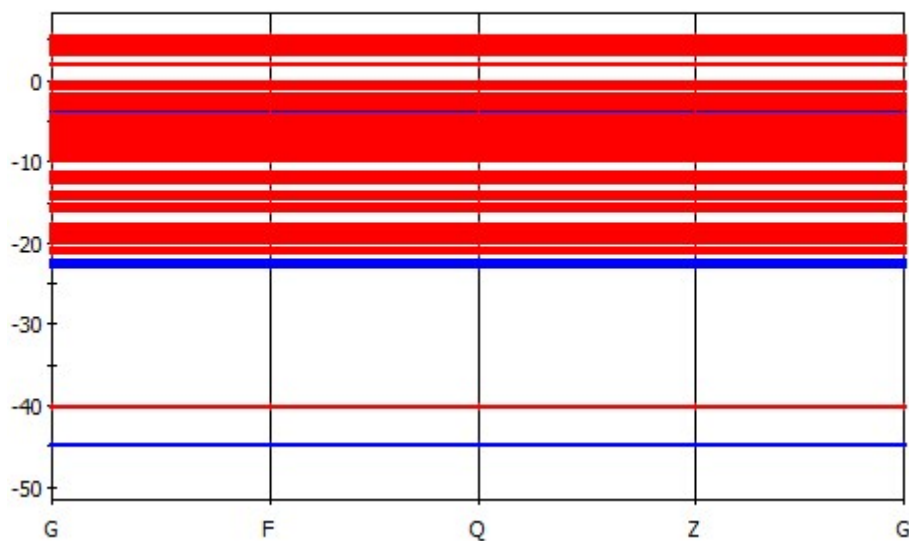

Figure S3 The calculated band structures of **Ia** and **IIc**.

For **Ia**, the lowest energy (1.8593 eV) of CBs is situated at G point, the highest energy (-0.0029 eV) of VBs is also located at G point. For **IIc**, the lowest energy (1.8071 eV) of CBs is situated at G point, the highest energy (0.0050 eV) of VBs is also located at G point.
